# Supplementary material
Source: PubMed Central journal article supplement (PMC3025413)
Supplement: NIHMS259680-supplement-Supp1.pdf [file NIHMS259680-supplement-Supp1.pdf]

## Gizard et al., Supplemental Data File

| Name                    | Use              | Sequence                                                             |
|-------------------------|------------------|----------------------------------------------------------------------|
| human TERT              | Real-time RT-PCR | F : 5'-TTCCTGCACTGGCTGATGAG-3'<br>R: 5'-CCGGTAGAAAAAGAGCCTGTTC-3'    |
| mouse TERT              | Real-time RT-PCR | F: 5'-GGCTCTTCTTCTACCGTAAG-3'<br>R: 5'-TGATGCCTGACCTCCTCTTG-3'       |
| mouse p16               | Real-time RT-PCR | F: 5'-CTTTGTGTACCGCTGGGAAC-3'<br>R: 5'-CGCTAGCATCGCTAGAAGTG-3'       |
| mouse p21               | Real-time RT-PCR | F: 5'-ACCCATACTTCCCCTTCTG-3'<br>R: 5'-ACCCTAGACCCACAATGCAG-3'        |
| mouse RB                | Real-time RT-PCR | F: 5'-CCTTGAACCTGCTTGTCTC-3'<br>R: 5'-GGGCAAGGGAGGTAGATTTTC-3'       |
| human TBP               | Real-time RT-PCR | F: 5'-GGAGAGTTCTGGGATTGTACCGC-3'<br>R: 5'-ATATTCGGCGTTTCGGGCAC-3'    |
| mouse TFIIIB            | Real-time RT-PCR | F: 5'-CTCTCCCAAGAGTCACATGTCC-3'<br>R: 5'-CAATAACTCGGTCCCCTACAAC-3'   |
| mouse 28S rRNA          | Real-time RT-PCR | F: 5'-AAACTCTGGTGGAGGTCCGT-3'<br>R: 5'-CTTACCAAAGTGGCCCACTA-3'       |
| hTERT-NF- $\kappa$ B    | ChIP PCR         | F: 5'-TCCATTTCCCACCCTTTCTCG-3'<br>R: 5'-AGGACGATTGCTCCCTGGAC-3'      |
| mTERT-NF- $\kappa$ B    | ChIP PCR         | F: 5'-CAGCAGGCTGGAGCAGTCAG-3'<br>R: 5'-CAGAATGCTTCTCGGGCTTC-3'       |
| mTERT-distal            | ChIP PCR         | F: 5'-GTGAGTTGAGATGATGCTCTGG-3'<br>R: 5'-CGACCATACTCAGATCCC-3'       |
| mMCP-1-NF- $\kappa$ B   | ChIP PCR         | F: 5'-CAGTCCTCACCCATTACATC-3'<br>R: 5'-TGGAAATTCCCATTCTGAGG-3'       |
| m $\beta$ -actin-distal | ChIP PCR         | F: 5'-AAACTCTCCCTCCTCCTTTCCT-3'<br>R: 5'-CGAGCCATAAAAGGCAACTTTTCG-3' |

**Supplemental Table I:** Primer sequences used in this study.

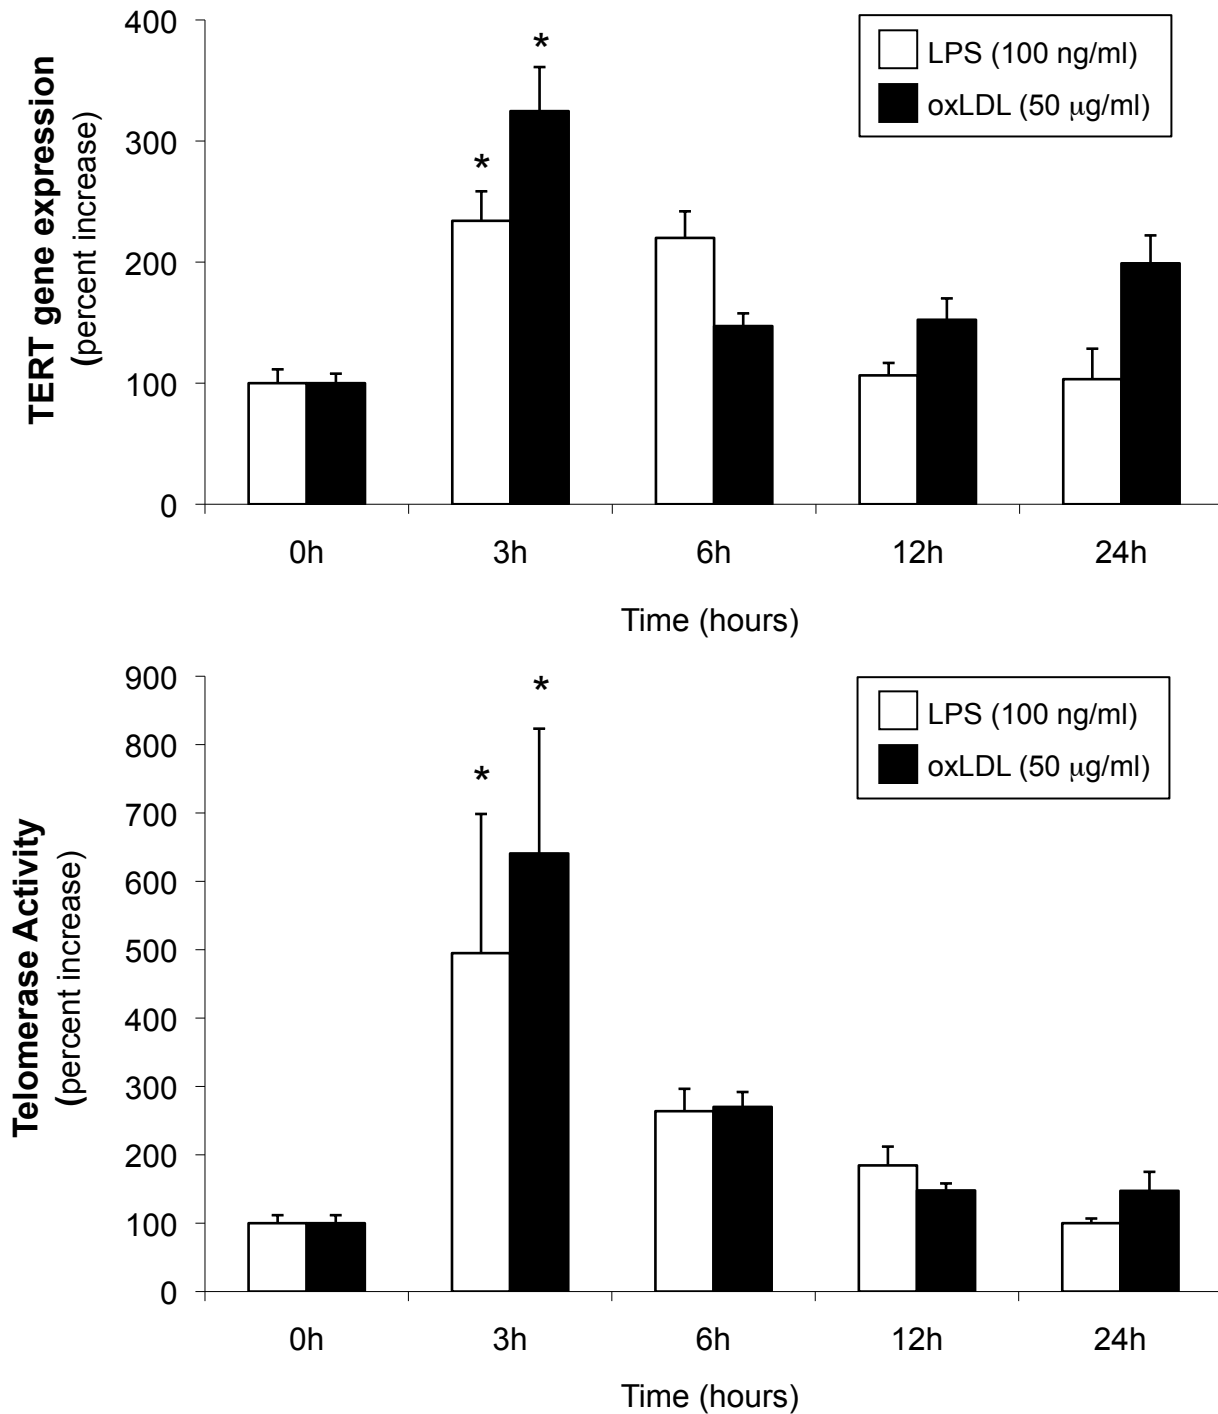

**Supplemental Figure I. Time-dependent induction of TERT expression and telomerase activity by oxidized LDL in human macrophages.** Differentiated human U937 macrophages were treated with LPS (100 ng/ml) or oxidized LDL (50 μg/ml). At the indicated time points, TERT mRNA expression levels (upper panel) and telomerase activity (lower panel) were analyzed. TERT mRNA expression was quantified by real-time RT-PCR and normalized to transcript levels of the house-keeping gene TBP. Whole cell proteins were analyzed for TERT activity by real-time PCR as described in “Materials and Methods”. All data are presented as mean ± SEM percent increase compared to untreated cells (n=3, \*  $P < 0.05$ ).

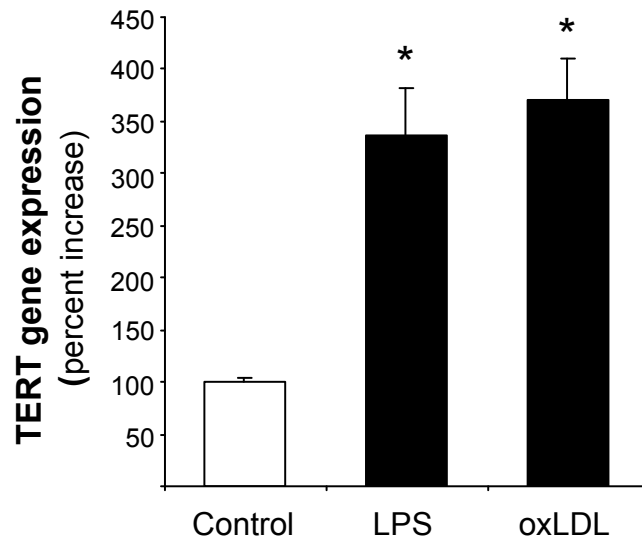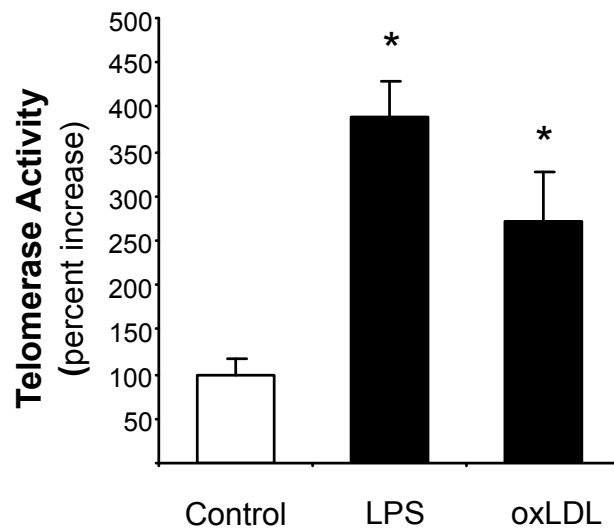

**Supplemental Figure II. Induction of TERT expression and telomerase activity by inflammatory stimuli in primary murine macrophages.** Mouse peritoneal macrophages were treated with oxidized LDL (oxLDL, 50  $\mu$ g/ml) or LPS (100 ng/ml). TERT mRNA expression levels (upper panel) were analyzed by real-time RT-PCR and normalized to transcript levels of 28S rRNA. Telomerase activity (lower panel) was quantified by real-time PCR as described in “Materials and Methods”. All data are presented as mean  $\pm$  SEM percent increase compared to untreated cells (Control), (n=3, \*  $P$ <0.05).

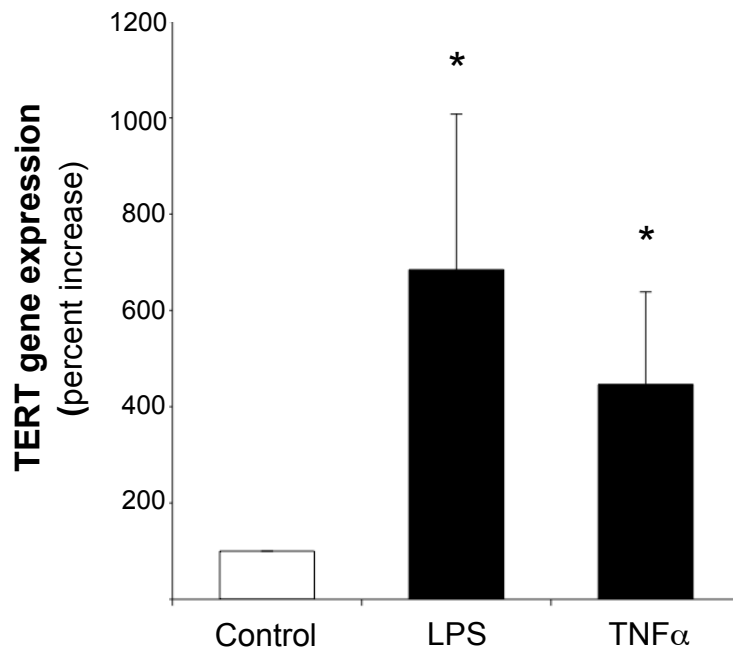

**Supplemental Figure III. Induction of TERT expression by inflammatory stimuli in primary human macrophages.** Mononuclear cells were isolated from blood of healthy normolipidemic donors. After Ficoll gradient centrifugation, monocytes were suspended in RPMI 1640 medium containing gentamycin (40  $\mu\text{g/ml}$ ), glutamine (0.05%) (Sigma), and 5% pooled human serum. Cells were cultured at a density of  $3 \times 10^6$  cells/well in 6-well culture dishes. Differentiation of monocytes into macrophages occurred spontaneously by adhesion of cells and culture for 12 days. Mature macrophages were cultured in 0.5 % serum overnight and treated with LPS (100 ng/ml) or TNF $\alpha$  (5 ng/ml). TERT mRNA expression was quantified by real-time RT-PCR and normalized to transcript levels of 28S rRNA. Data are presented as mean  $\pm$  SEM percent increase compared to untreated cells (Control), (n=3, \* P <0.05 vs. Control).

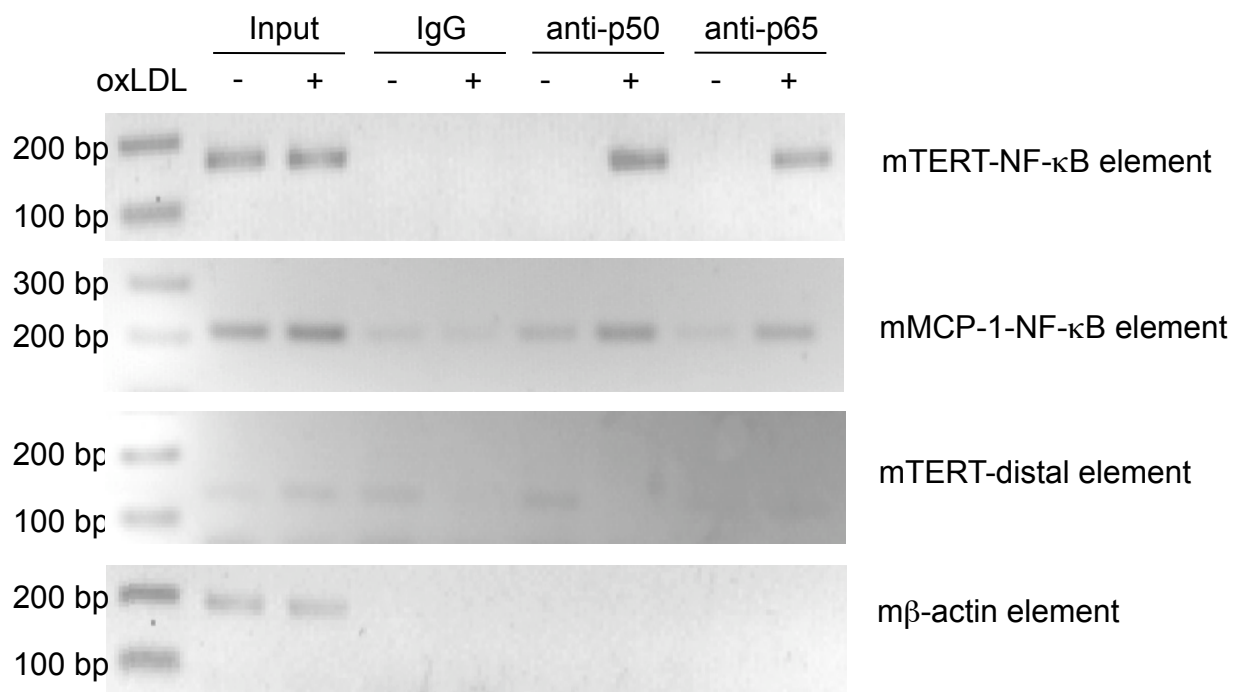

**Supplemental Figure IV. Oxidized LDL induces NF- $\kappa$ B binding to the endogenous TERT promoter in primary murine macrophages.** Mouse peritoneal macrophages were treated for 2.5 h with oxidized LDL (50  $\mu$ g/ml). Chromatin immunoprecipitations were performed with antibodies raised against p50 or p65, followed by PCR amplification using primer pairs that cover the proximal NF- $\kappa$ B site in the murine TERT promoter (mTERT-NF- $\kappa$ B element). Controls included non-precipitated genomic DNA (Input) or immunoprecipitations performed with non-immune IgG (IgG). Additional controls for specificity included PCR amplification with primer pairs encompassing the NF- $\kappa$ B site in the murine MCP-1 promoter (mMCP-1-NF- $\kappa$ B element, positive control), a distal unrelated element in the murine TERT promoter (mTERT-distal element, negative control), or the unrelated murine  $\beta$ -actin promoter (m $\beta$ -actin element, negative control). All ethidium bromide-stained agarose gels shown are representative of three independently performed experiments.
